# Supplementary material
Source: PubMed Central journal article supplement (PMC6238730)
Supplement: jciinsight-3-123072-s108.pdf [file jciinsight-3-123072-s108.pdf]

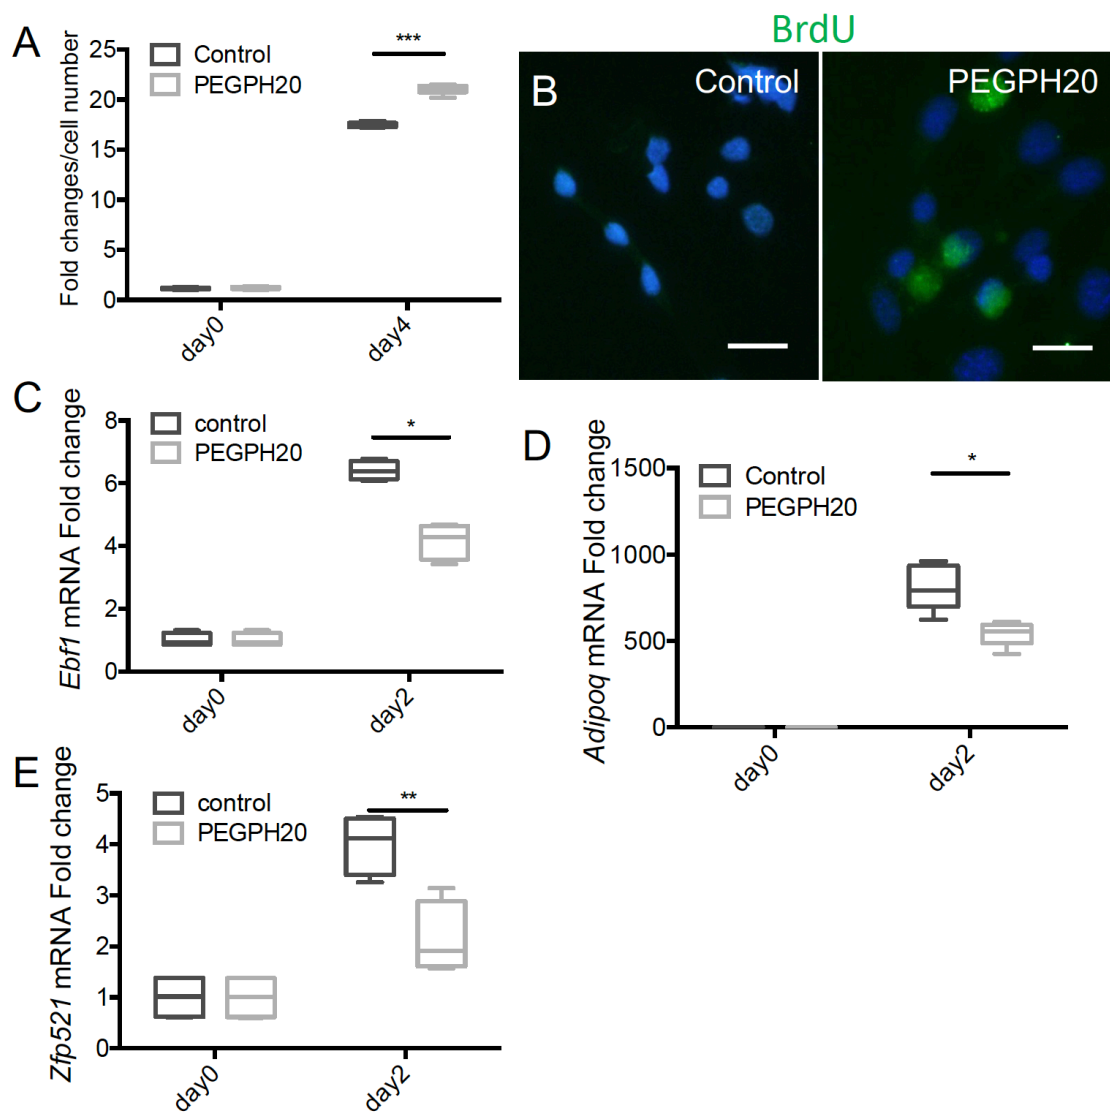

**Supplemental Figure 1.**

**Adipogenesis is inhibited by hyaluronidase.**

Mouse preadipocytes (3T3L1) were differentiated by the addition of adipocyte differentiation media (see methods) with or without the addition of 20 ug/ml of recombinant hyaluronidase (PEGPH20). (A) Cell numbers were analyzed by SRB assay and normalized to that of day 0 number. (B) Proliferative preadipocytes stained green with anti-BrdU. Scale Bar = 50 Microns. (C-E) Relative expression of mRNA for EBF1, Adipoq and Zfp521 at day 2 of differentiation. Data in A, C-E are represented using box-and-whiskers plots, with boxes representing the IQR, lines representing the median value, and whiskers representing minimum and maximum values, whereas data in D is represented as mean  $\pm$  SEM; \*  $P < 0.05$ , \*\*  $P < 0.01$  (t test).

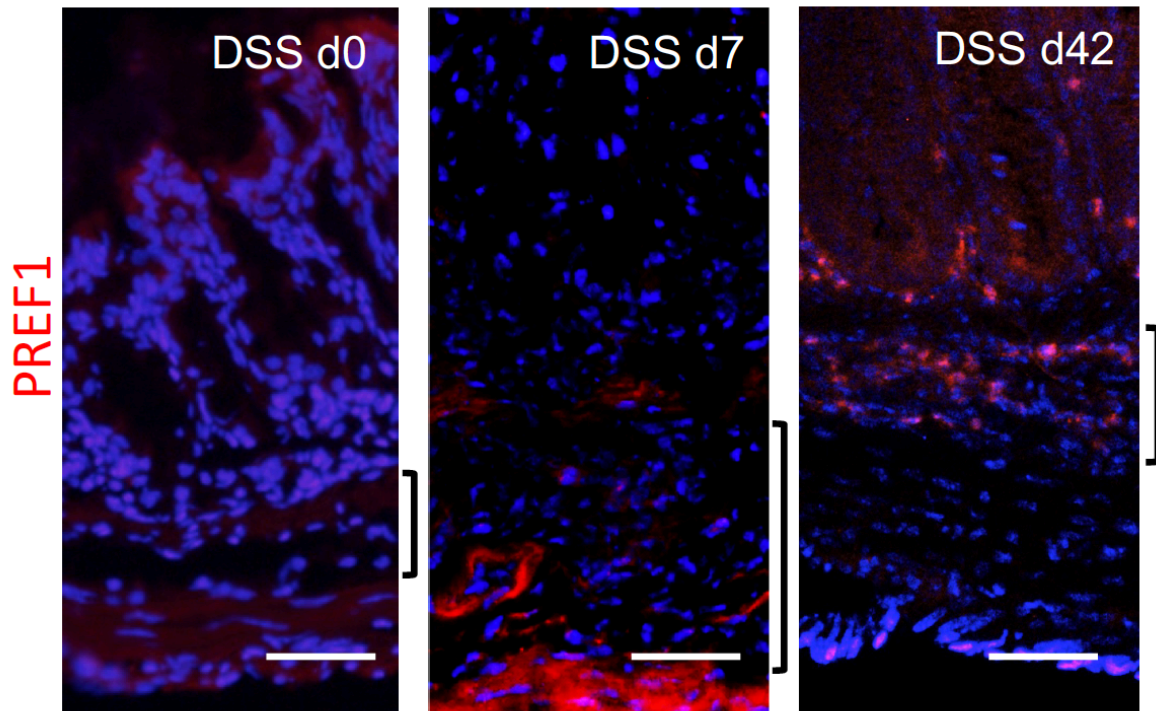

**Supplemental Figure 2.**

**Pref1 expression increases in colitis.**

Representative histology stained with anti-PREF1/DLK of distal colon sections from control mice or mice at day 0 and 7 days or 42 days after being provided with 3% DSS colitis in drinking water. Brackets delineate submucosal region occupied by adipocytes. Scale Bar = 50 Microns.

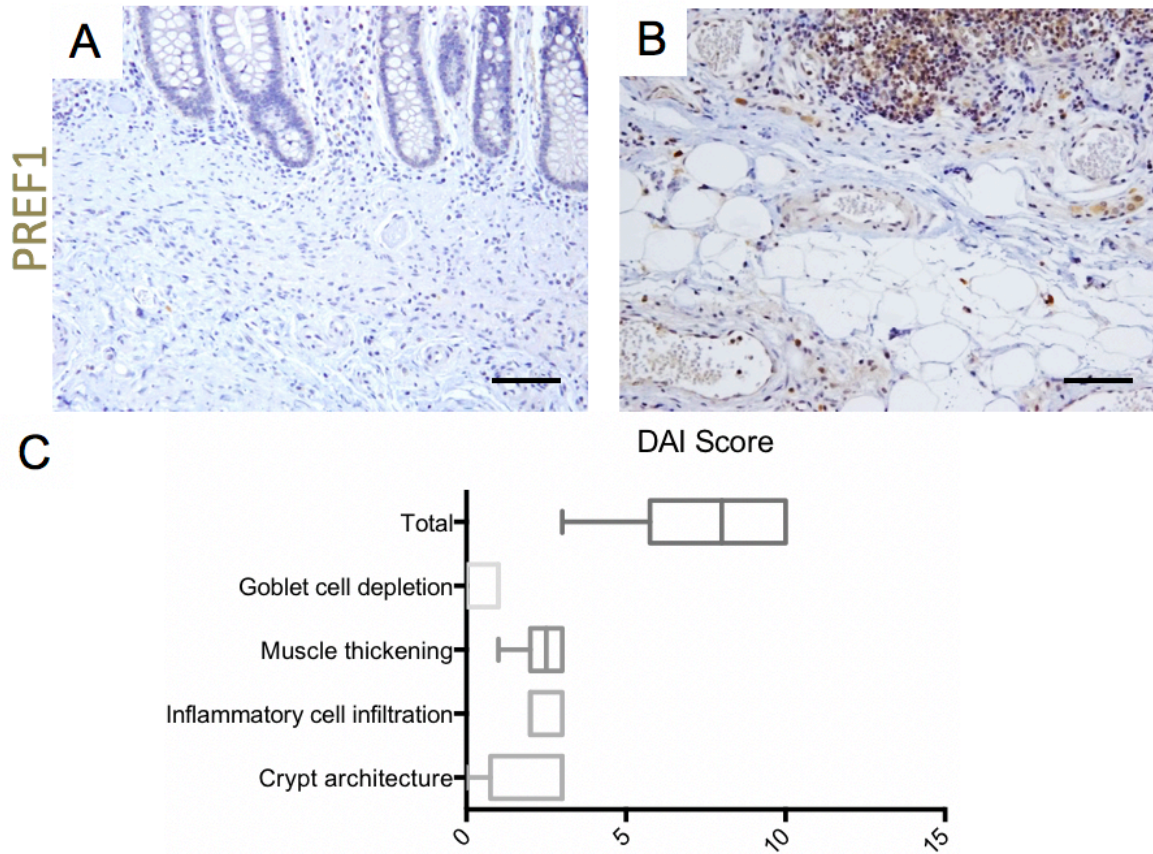

### Supplemental Figure 3

#### Adipogenesis is coincident with HA accumulation in IBD patients.

Representative histology from colon sections from Crohn's disease ((n=5). **(A)** Uninvolved section from subject stained for Pref1. **(B)** Inflamed colon from the same patient stained for Pref1. **(C)** Disease activity index score of IBD patients. Scale Bar = 20 Microns. Data in C is represented using box-and-whiskers plots, with boxes representing the IQR, lines representing the median value, and whiskers representing minimum and maximum values; \*\* P < 0.01, \*\*\* P < 0.001 (t test).



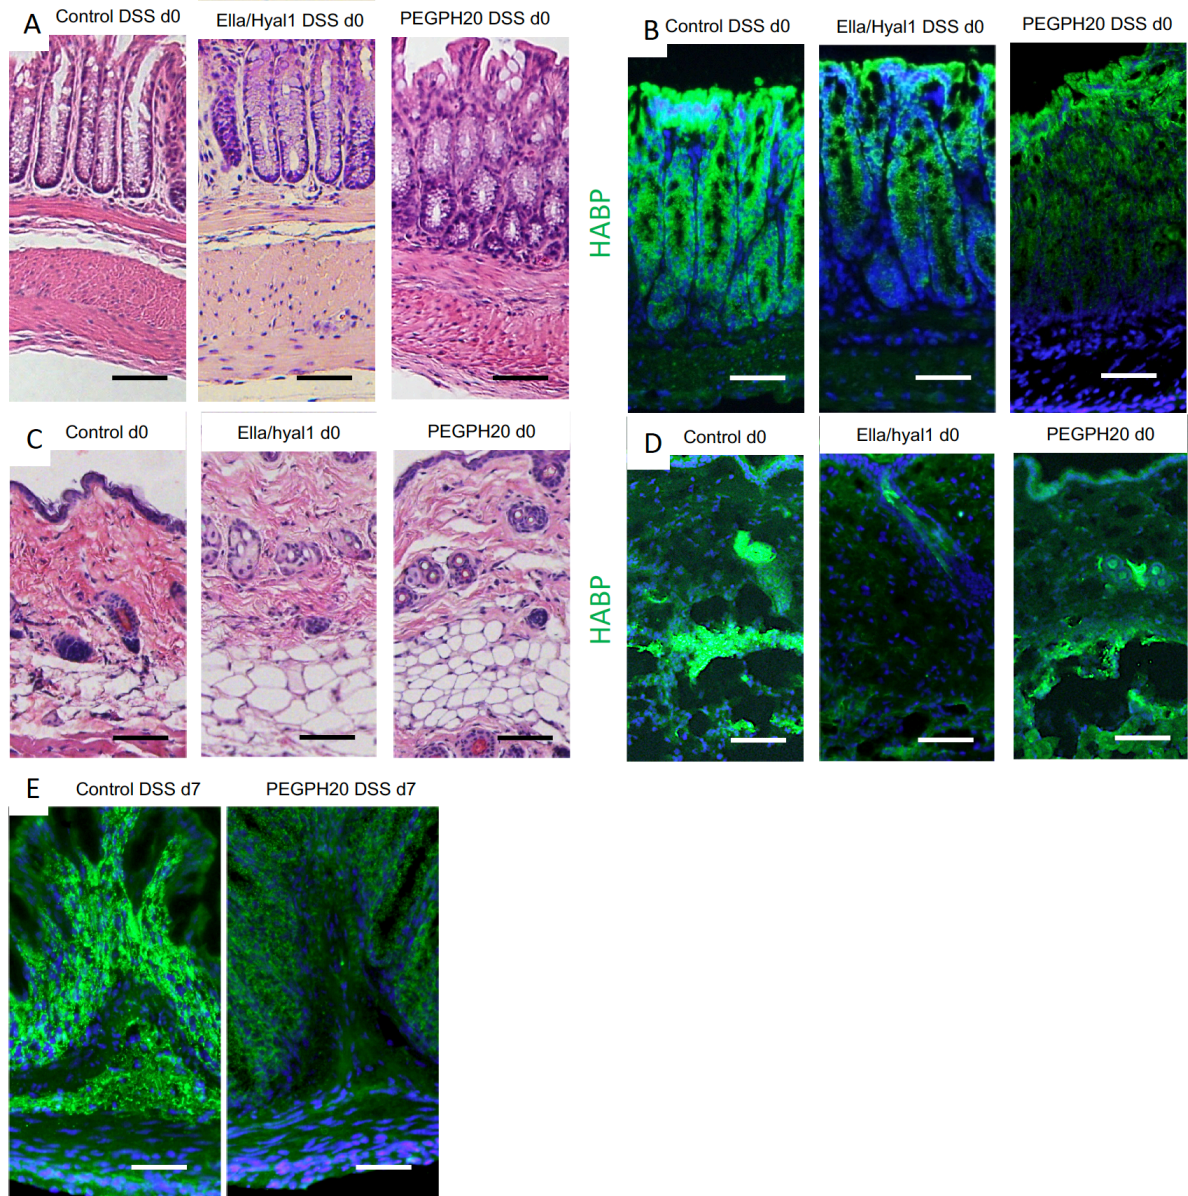

#### Supplemental Figure 4

##### **Hyaluronidase is effective to digest HA in skin and colon.**

Representative histology of WT, Ella/hyal1 and PEGPH20 injected mice. (A, B) Normal distal colon section of WT, Ella/hyal1 and PEGPH20 injected mice stained with (A) H&E and (B) with HABP for HA. (C, D) Skin sections of WT, Ella/hyal1 and PEGPH20 injected mice stained with (C) H&E and (D) HABP for HA. (E) HABP staining of colon at day 0 (control) and 7 days after DSS administration and treated with PEGPH20



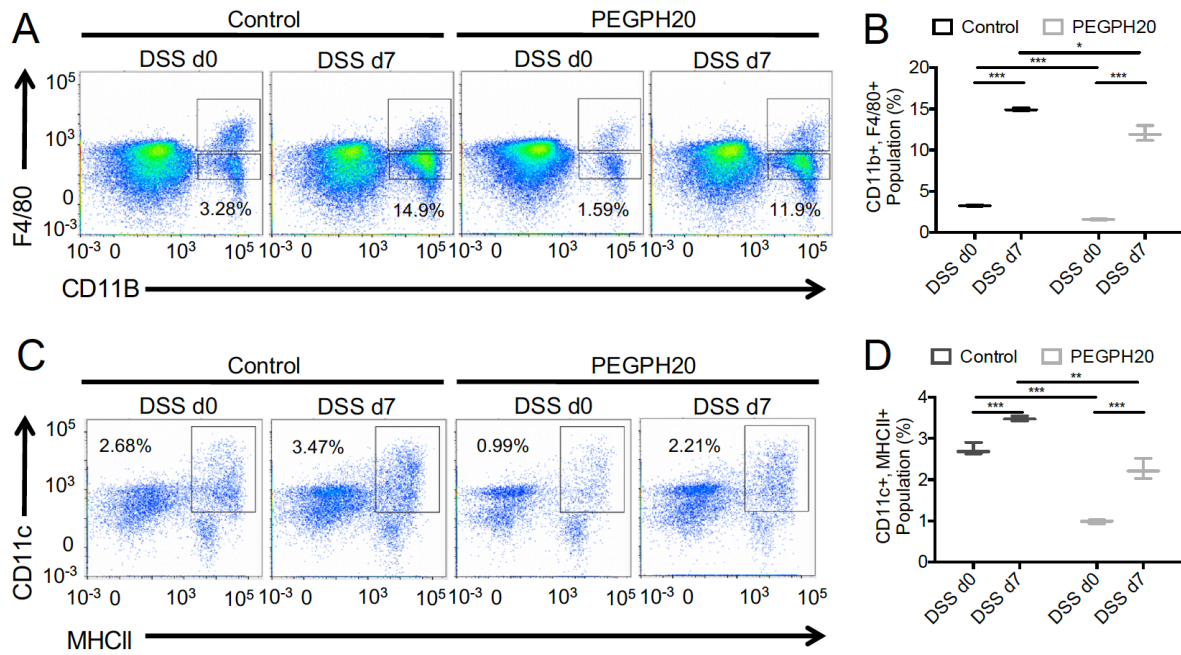

### Supplemental Figure 5

#### Hyaluronidase results in decreased macrophages and dendritic cells during DSS colitis.

(A to D) Flow cytometry analysis of colon lamina propria single cell suspensions showing expression of (A, B) F4/80 and CD11B and (C, D) CD11C and MHC II from DSS d0 control, PEGPH20 d0, DSS d7 control and PEGPH20 treated DSS d7 mice. Numbers represent the percentage of the cells in the indicated gate. Data in B and D are represented using box-and-whiskers plots, with boxes representing the IQR, lines representing the median value, and whiskers representing minimum and maximum values ; \*\*  $P < 0.01$ , \*\*\*  $P < 0.001$  (t test).

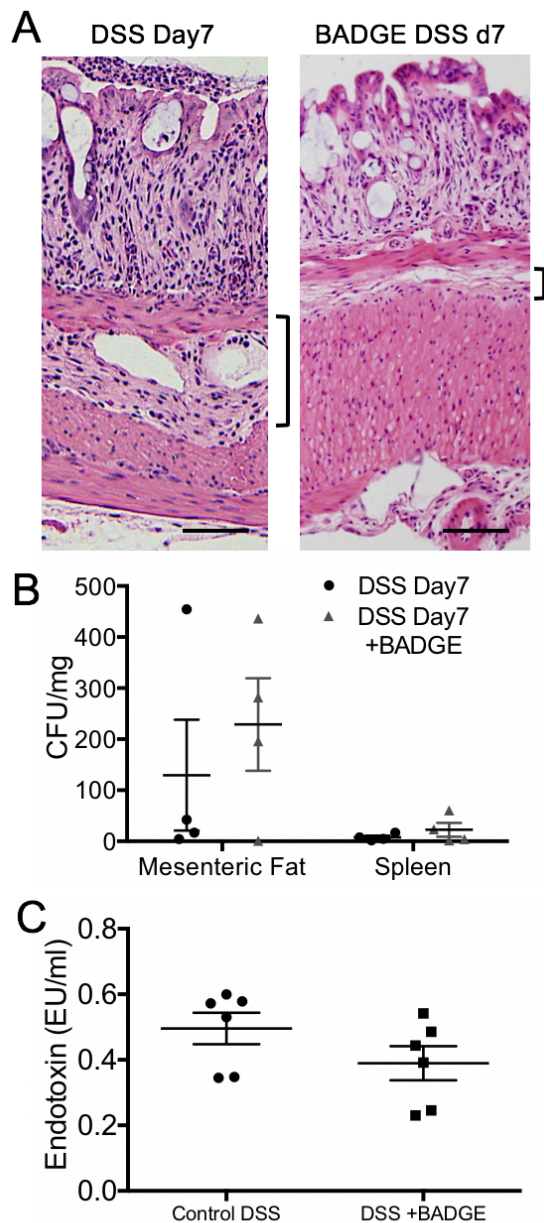

### Supplemental Figure 6

#### Incomplete inhibition of inflammatory response by PPAR $\gamma$ agonist.

(A) Representative histology of distal colon sections in colitis of WT and BADGE treated mice were stained with H&E. (B) Systemic bacteremia detected after colitis in mesenteric fat and spleen from WT and with BADGE treatment (N=4 mice/group). (C) Endotoxin concentration in the serum from WT and with BADGE treatment (N=4 mice/group). All error bars indicate mean  $\pm$  SEM; \* P < 0.05, \*\* P < 0.01, \*\*\* P < 0.001 (t test).

| Supplemental table 1 | Up-regulated genes by DSS | Down-regulated genes by DSS |
|----------------------|---------------------------|-----------------------------|
|                      | Reg3b                     | Dbp                         |
|                      | Sptssb                    | Ciart                       |
|                      | Nos2                      | Lars2                       |
|                      | Plet1                     | Vaultrc5                    |
|                      | Apol10a                   | Fut9                        |
|                      | Mmp3                      | Npy1r                       |
|                      | Retnlb                    | Nxpe2                       |
|                      | Isx                       | Reg4                        |
|                      | Lbp                       | Cps1                        |
|                      | Clca4b                    | Ctnnbp2                     |
|                      | Cemip                     | Trf                         |
|                      | Socs3                     | Chodl                       |
|                      | Dhrs9                     | Tef                         |
|                      | Slpi                      | Ttr                         |
|                      | Tnf                       | Snora23                     |
|                      | Mfsd2a                    | Jchain                      |
|                      | Slc3a1                    | Smoc2                       |
|                      | Aldh1a3                   | Slc16a12                    |
|                      | Nfil3                     | Gjb4                        |
|                      | Mmp13                     | Per3                        |
|                      | Tac1                      | Mir6236                     |
|                      | Chn2                      | Itih2                       |
|                      | 1810065E05Rik             | Plk3                        |
|                      | Ly6c1                     | Cdo1                        |
|                      | Cxcl5                     | Axin2                       |
|                      | Adra2a                    | Snord22                     |
|                      | Acacb                     | Tmprss13                    |
|                      | Wfdc18                    | Rnf32                       |
|                      | B3gnt6                    | Kyat1                       |
|                      | Slc5a9                    | Trpv6                       |
|                      | Rian                      | Tppp3                       |
|                      | Serpina3n                 | Igsf10                      |
|                      | Meg3                      | Pyroxd2                     |
|                      | Dnah17                    | 2310079G19Rik               |
|                      | Duoxa2                    | Mptx2                       |
|                      | Duox1                     | Gsta3                       |
|                      | Car12                     | 0610005C13Rik               |
|                      | B4galnt1                  | Per2                        |
|                      | Ttyh1                     | Fzd7                        |
|                      | Gm12250                   | Ctgf                        |
|                      | Trim15                    | Tenm4                       |
|                      | Car8                      | Rn45s                       |
|                      | E2f2                      | Hopx                        |
|                      | Duox2                     | Gjb5                        |



St3gal1  
Mgat4c  
Agpat9  
Steap4  
Plat  
Hmgcs2  
Ccl20  
Cd177  
Rnf150  
Nlrc5  
C2cd4b  
Cmah  
Gda  
Shank3  
Nupr1  
ligp1  
Mx1  
Zbp1  
Gm5431  
Gm14137  
Plaur  
Col23a1  
Ptk6  
Syt6  
Slc9a3  
Ddah1  
Gcg  
Serpina3g  
Ly6a  
Zc3h12a  
Cpn2  
Gbp6  
Il1rl1  
Casc4  
Gpnmb  
Snhg11  
Ifit1  
Trim40  
Ifit2  
Osmr  
Lpo  
Il18bp  
Cdhr1  
Muc2  
Muc1

Slc2a5  
Timp4  
Atp10a  
Fam46c  
Sstr1  
Mptx1  
Sorcs2  
Spin4  
Mir6516  
Serpina9  
Apobec2  
Ces1f  
2410006H16Rik  
Prkar2b  
Ace2  
Gstm1  
Csad  
Hist3h2a  
Terc  
Car3  
9230105E05Rik  
Slc16a9  
Arl4d  
Nr1d2  
Hist1h1a  
Eda2r  
Bambi  
Tmem132c  
Ptpro  
Pdzd7  
Hist2h2be  
Scarna6  
Hoga1  
Gm14391  
Cldn2  
Glp2r  
Cnn3  
Ephb6  
Hist4h4  
Hist1h2bb  
Ugt2b35  
Aqp1  
Celf4  
Hykk  
Cox7a1

|               |               |
|---------------|---------------|
| Ffar4         | 5033404E19Rik |
| Cldn8         | Il33          |
| Casp4         | Wee1          |
| Adamts1       | Ces1e         |
| Ceacam10      | Scarna13      |
| Pla2g2a       | Dnah8         |
| Arhgap20      | Col4a6        |
| Wtip          | Gm16576       |
| Npas2         | Hist1h3b      |
| Prox1         | Dok7          |
| Rel           | Prdx4         |
| Apol6         | Snora78       |
| Myrip         | Hist2h2bb     |
| Bcl6          | Rpph1         |
| Csf2rb        | Fam132a       |
| Tdrd1         | Csrnp1        |
| Cpne8         | Hist1h2bm     |
| 1700120E14Rik | Sun2          |
| Ranbp17       | Cenpp         |
| Dmbt1         | Epb41l4aos    |
| Aqp4          | Naaladl1      |
| Rsad2         | Ptpru         |
| Ifi47         | Snord17       |
| Slc7a9        | Per1          |
| Cnn1          | Amica1        |
| Nov           | Clec14a       |
| B3galt5       | Hist1h2bl     |
| Fer1l4        | Hist1h2bn     |
| Appl1         | Hist1h1b      |
| Pfkfb3        | Hist1h3a      |
| Cpne2         | Crip1         |
| Igfbp5        | Gstm6         |
| Tmem181c-ps   | Aldh1b1       |
| Cd38          | Smim24        |
| Slc7a5        | Paqr7         |
| Gm13363       | Acer1         |
| Gm10400       | Frem2         |
| Sec1          | Etv4          |
| Zfhx2         | Hist1h3e      |
| Gbp5          | Hist1h4h      |
| Gbp4          | Hist1h3c      |
| Ypel2         | Slc16a11      |
| Gpr22         | Hist1h2bq     |
| Rdh16         | Hist1h2br     |
| C3            | Hist1h2be     |

Lrp8  
Ak4  
Des  
C4b  
Tnfrsf1b  
1700024P16Rik  
Adora1  
Ncoa7  
F2rl2  
Ttn  
Slc51b  
Nckap5  
Tmigd1  
Oasl2  
Slc35d1  
Nfasc  
Bglap3  
Cxcl13  
Slc13a2  
Slc13a2os  
Pde9a  
Htr2b  
Dnm3os  
Sulf2  
Gna14  
Wfdc17  
Bhlha15  
Ceacam2  
Ereg  
Csf2rb2  
Mgll  
Map3k8  
Fam196a  
Megf11  
Fut2  
Htra3  
Mapre3  
Cyp2c65  
Lgals9  
Clca3a1  
Fkbp5  
Sppl2a  
Fcgr2b  
Armcx4  
Cp

Rgs10  
Kyat3  
Hist1h3g  
Phlda3  
Fgfr3  
Hist1h2ad  
Hist1h4c  
Mycl  
Tmem14a  
Snora74a  
Gstm3  
Hist1h2ap  
Hist1h2bk  
Hist1h2bh  
Itpripl2  
Acyp1  
Efna4  
Hist1h3d  
Hist1h4f  
Lipt2



Pcsk5  
Trim72  
Ifit3b  
C77370  
Slc10a2  
Lgmn  
D730005E14Rik  
Col8a1  
Gm8615  
Il4ra  
Ceacam1  
Tnip3  
Tead1  
Socs1  
Synm  
Bach2  
Arhgap27os3  
Gsdmcl-ps  
Itgam  
Gm19461  
Tnfsf10  
Paqr8  
Mgp  
Rassf4  
Fam3b  
Arhgap23  
Xdh  
Apol9a  
Ogfrl1  
Tgtp2  
Ccl9  
Mmp28  
Actg2  
Kcnn3  
Stc2  
Nlrp9b  
Gnpda1  
Prps1  
Hspa1a  
Tagln  
Hmox1  
Galnt18  
Piezo1  
Pclo  
Sidt1

Gem  
Lypd6b  
Nt5c1a  
Hcn2  
Cwh43  
Ttc7b  
Kctd12  
Hspa1b  
4931406H21Rik  
Ly6c2  
AI661453  
Mbd6  
Itga2  
Zdhhc13  
Slc4a7  
Pgap1  
Pla2g5  
Ang4  
4930565N06Rik  
Muc4  
Ppm1l  
Sgk2  
Mospd3  
Hcls1  
Il18  
Isg15  
Arap3  
Tmem139  
Tmem38b  
Emp1  
Auts2  
Kcnk6  
Cd68  
Pdlim3  
Glipr2  
Vcam1  
Pde8a  
Reln  
Cry1  
Slc30a10  
Muc13  
Sod3  
Plekhm1  
Tbc1d9  
Pstpip2

Tgtp1  
Arntl  
Prr13  
9930111J21Rik2  
Tnfaip2  
Tc2n  
Slc2a4  
Tpm2  
Grin1os  
Mboat2  
Ermp1  
Ido1  
Ecscr  
Satb1  
Cdx2  
Pag1  
Oas3  
Gramd3  
2010016I18Rik  
Nol4l  
Fzd3  
Nkain1  
Slc36a4  
Slc5a3  
Insl3  
Fam219a  
Brd4  
Gm13889  
Igsf6  
Themis2  
D17H6S56E-5  
Nfkbiz  
Nlgn2  
Evi2b  
Tanc2  
Stat2  
Setd1b  
Rrbp1  
Rbms3  
Tifa  
Apob  
Cnm2  
Pappa  
Fyb  
Fgl2



Abca5  
Gnao1  
Slc28a3  
Tnfsf13b  
Cyp2d9  
Pcdhgb2  
Ffar2  
Lrrc32  
Hivep3  
Igtf  
Adrbk2  
Pdpn  
Galnt16  
Plxnc1  
Areg  
Neat1  
Lonrf3  
Flt4  
Prdm1  
Ier5  
Etnppl  
Rdh18-ps  
Tmcc3  
Leo1  
Icam1  
Ttyh3  
Lrrtm2  
Dclk1  
Daglb  
Kmt2d  
Syvn1  
Slc8a1  
A330023F24Rik  
Eid3  
Ifit3  
AW112010  
Atn1  
2210407C18Rik  
Mafb  
Lhfpl2  
Pgs1  
Ehd4  
Nbea  
Cyp2d10  
Dmxl2

H2-T24  
Chad  
Robo2  
Grem1  
Sema7a  
Hyou1  
Tifab  
Cfh  
Arid3a  
Cd84  
Ttc22  
Gprc5a  
Basp1  
Hck  
Laptm5  
Adap2  
Adcy2  
Parp14  
Ubd  
Polq  
Strip2  
Pmepa1  
Cntnap1  
Rbpms  
Pgm5  
Ripk3  
Cd47  
2610528A11Rik  
Crem  
Arhgap35  
Alox5  
Camk2n1  
4732471J01Rik  
Macf1  
Galnt3  
Ralgapa2  
Ccdc97  
Zfp9  
St8sia5  
Cacna1b  
Irgm2  
Spon1  
Slit2  
Gbp2  
Gm15708

Ano7  
Tgm2  
B3gnt5  
Zfand5  
Slc9a1  
Pcp4l1  
Ppp2r1b  
Bmp7  
Anks6  
Bcl2l11  
Srgap1  
Abcc5  
Itgb2l  
Srrm2  
Ptpn2  
Tmc5  
Atp8a1  
9130008F23Rik  
Abcg8  
Kazn  
Myo1d  
Abhd6  
Eif4g3  
Proser1  
Rims2  
Hap1  
Pom121  
Fam124a  
Efnb2  
Ppy  
Ttl10  
Nus1  
Fndc3b  
Acadl  
Exoc6b  
Nos1  
AW551984  
Scarf2  
Alg3  
Tspan6  
Plod2  
Fam122a  
6430548M08Rik  
Ptafr  
Scg3



Fbrs  
Mpzl1  
Dtx3l  
Jak3  
Ryr2  
Fry  
Cacna1h  
Tlr4  
Igf2bp2  
Ifit1bl1  
Arl14  
Rdh19  
Mroh3  
Pnrc1  
Tmem184c  
Ifit1bl2  
Pdlim7  
Arhgap17  
Cmtm8  
Eif4e3  
Psm8  
Tbrg3  
Dock4  
Abi2  
Tinagl1  
Mvb12b  
Rdh9  
Srrm1  
Hk2  
Clec7a  
Unc5a  
Ripk2  
C1galt1  
Iqgap2  
Rtp4  
Rhoj  
Slco3a1  
Tmem220  
Pcsk1n  
Pcdhgb7  
Prr12  
Ppifos  
Rnf44  
Aoc2  
Srgap3

Pglyrp1  
Hipk2  
Ssh2  
Kdm7a  
Rnf39  
Pappa2  
Hgf  
Sema4a  
Srcap  
Celsr3  
Bcl3  
Krt84  
Gdap10  
4930594C11Rik  
Sh3kbp1  
1190002N15Rik  
Trafd1  
Atp10b  
Klhdc8a  
Fabp2  
Tmem131  
Stambp  
Kmt2a  
Dvl3  
Trim12a  
Mmp15  
Mpp3  
Kirrel3  
Spen  
B230354K17Rik  
Plagl2  
B4galnt2  
A430088P11Rik  
Hspa5  
Acer2  
St5  
3110062M04Rik  
Ncor2  
Asap1  
Grb10  
Tprn  
Plxna4  
Itgav  
Neto2  
Ankrd22

|               |        |
|---------------|--------|
| Lpin2         |        |
| Osbp17        |        |
| Phactr2       |        |
|               | 10-Sep |
| Trim36        |        |
| Cyp2c55       |        |
| Tnfrsf11a     |        |
| Apol7a        |        |
| Zdhhc9        |        |
| 5830444B04Rik |        |
| 1110059E24Rik |        |
| Sema6b        |        |
| Pcdhga9       |        |
| Syn3          |        |
| Capn13        |        |
| Tex9          |        |
| Fth1          |        |
| Cd14          |        |
| Cpeb2         |        |
| Dcp2          |        |
| Slc16a6       |        |
| Creb3l1       |        |
| Ugt1a6b       |        |
| Gabbr1        |        |
| Zfp711        |        |
| Trp53i11      |        |
| Tlr2          |        |
| Ubqln2        |        |
| Rimbp2        |        |
| Apaf1         |        |
| Lgals3bp      |        |
| Col18a1       |        |
| 3110043O21Rik |        |
| Ptpn23        |        |
| Tbc1d15       |        |
| Fgd5          |        |
| Ptpn          |        |
| Hip1          |        |
| 2010109I03Rik |        |
| Ms4a8a        |        |
| Ptp4a1        |        |
| Prom1         |        |
| Hkdc1         |        |
| Rab6b         |        |
| Fxyd6         |        |

|               |  |
|---------------|--|
| Nr1h4         |  |
| Galc          |  |
| Cnbd2         |  |
| Creld2        |  |
| Pyy           |  |
| Figl2         |  |
| Fscn1         |  |
| B130006D01Rik |  |
| Abhd17b       |  |
| Nectin1       |  |
| Irf7          |  |
| Fas           |  |
| Ick           |  |
| Gan           |  |
| Rsc1a1        |  |
| Asap2         |  |
| Capg          |  |
| Sec24a        |  |
| Ankrd28       |  |
| Tcf23         |  |
| Prrc2a        |  |
| 5330417C22Rik |  |

| Supplemental table 2 | Up-regulated genes by PEGPH20                                                                                                                                                                                                                                                                            | Down-regulated genes by PEGPH20                                                                                                                                                                                                                                                                                                                                                                                      |
|----------------------|----------------------------------------------------------------------------------------------------------------------------------------------------------------------------------------------------------------------------------------------------------------------------------------------------------|----------------------------------------------------------------------------------------------------------------------------------------------------------------------------------------------------------------------------------------------------------------------------------------------------------------------------------------------------------------------------------------------------------------------|
|                      | Lars2<br>Mir6236<br>Cxcl5<br>Rn45s<br>Plat<br>Hspa1a<br>Hspa1b<br>Trf<br>Syt8<br>Chodl<br>Ctnnb2<br>Tmprss13<br>Reg4<br>Slc16a12<br>Pyroxd2<br>Fam46c<br>Ankrd37<br>Nxpe2<br>Fut9<br>Mptx2<br>Steap4<br>Hoxd10<br>Banp<br>Snord22<br>Gatm<br>Smoc2<br>Mptx1<br>Tmem173<br>Slc4a4<br>Dbp<br>Fzd7<br>Ciart | Mmp13<br>Tmigd1<br>Sptssb<br>Cemip<br>Reg3b<br>Gm13363<br>B3gnt6<br>Mmp3<br>Creb3l3<br>Cyp2c65<br>1810065E05Rik<br>Ptgs2<br>Lpo<br>Slc3a1<br>Mt2<br>Ido1<br>Ifit2<br>Retnlb<br>Cmah<br>Il1rl1<br>Rian<br>Car8<br>Slc7a9<br>Gcg<br>Cd177<br>Gchfr<br>Ifit1<br>Adap2<br>Serpina3n<br>Plet1<br>Ereg<br>Cyp2d10<br>Ilgp1<br>Emp1<br>Slpi<br>C4b<br>Apol9a<br>Ly6c1<br>Ccl20<br>Ccr2<br>St3gal1<br>Zfp37<br>Mgll<br>Ncoa7 |

Adra2a  
Cyp2d11  
Hmgcs2  
Ppy  
Gm5431  
Pappa  
Chn2  
Aldh1a3  
Col18a1  
Ccr1  
Mboat2  
Gadd45a  
Tcf23  
Pdpn  
Cp  
Acacb  
Ms4a6c  
Krt23  
Cyp2d9  
Igfbp5  
Isg15  
Adamts1  
Zg16  
Gpnmb  
Rac2  
B4galnt1  
Spink1  
Tnf  
Myrip  
Cyp4f14  
Casc4  
1500009L16Rik  
Aldh3b1  
Entpd1  
Apold1  
Bmp7  
Nt5c1a  
Fabp2  
Itgam  
Rsad2  
Apol10a  
Apol6  
Gm14137  
Ednrb  
Dpep1

Fcgr3  
C3  
Ces2b  
Mapre3  
Hsd3b2  
Mmp19  
Rab37  
Mep1b  
Tex9  
Sema3a  
Ifi47  
C77370  
Ifit3  
Slc2a4  
Ccl9  
Fkbp5  
Ppfia3  
Bglap3  
Aqp8  
Svep1  
28-Feb  
Hsd3b3  
Pde4b  
Gngt2  
Srxn1  
Ttyh1  
Dcn  
Mgat4c  
Tek  
Ptpro  
Cdh13  
Clec7a  
Fbxo44  
Ranbp17  
Serpina3g  
Nat8f2  
Itgal  
Aspa  
Tmem37  
Apobec1  
1700052K11Rik  
Ppp3cc  
Pla2g15  
Nat8f4  
Neto2

9930111J21Rik2

Esam

Gm12250

Slfn5

Ccdc122

Hbb-b2

Hbb-bt

Tnfaip2

Gbp4

Ces2c

Gbp6

Apoc2

Dnase2a

Ugt1a1

Lama4

Car1

Ube2l6

Hba-a2

Clca4b

Antxr1

Prss30

Ccrl2

Ceacam10

Ces2d-ps

Ces2e

Lyve1

Prex1

Chst11

Rgs13

Plek

Dgat2

Hbb-b1

Hbb-bs

Ifit3b

Ggt1

2210407C18Rik

AW112010

Lepr

Ubd

St8sia4

Gm20939

Isx

Igfbp7

Lgals9

Prom1



Pdlim2  
H2-Q1  
Cfh  
Rgl1  
Capg  
Mt1  
Loxl2  
Dhx58  
Espn  
Sgk1  
Bik  
Casp3  
Zfp820  
Alox5ap  
Csf2rb  
Car4  
Sod3  
Tyrobp  
Agpat9  
Arl14  
Tstd3  
Vav3  
Gpt  
Spata6  
Mmrn1  
Srgn  
Tff3  
Spns2  
Gm3336  
Btnl6  
Adgrl3  
Ppm1m  
Tgm2  
Kremen2  
Pld4  
Trim6  
Mgp  
Slc16a6  
Sepp1  
P3h4  
Abcg2  
Nrp1  
Ly6a  
Cd84  
Ang4

Dusp10  
Cxcl12  
Alox5  
Slc26a3  
Cd53  
Gm5141  
Rtp4  
Kctd18  
Chic1  
Slc25a34  
Glrx  
A630066F11Rik  
Slc30a1  
Col12a1  
Cyp2c55  
C1qtnf1  
C1galt1c1  
Gpcpd1  
Sectm1b  
Ogfrl1  
Saa2  
Sult1d1  
Abhd6  
Zfp52  
Glipr2  
Hkdc1  
Lypd8  
Ly6c2  
Sla  
Ggh  
C2  
Meg3  
Pcsk5  
Lrrc19  
Zfp781  
Clec2e  
Vcam1  
Bcap29  
Herc6  
AI507597  
Sult1b1  
Postn  
Itga8  
Pax8  
Psmb8

Lyz2  
Rbks  
Gbp2  
Slc34a2  
Nceh1  
Arntl  
Igfbp4  
Psmb9  
BC021614  
Rasgrf2  
Itga4  
Gem  
Tspan6  
Il10ra  
Cwh43  
Plekho2  
Rbms3  
Zfp994  
Hip1  
Sema7a  
Car12  
Dcxr  
Hmox1  
C2cd4b  
Pla2g3  
Hsd12  
Lpin2  
Tnfsf13b  
Zfp995  
Afmid  
Sdhaf1  
Gdpd2  
Ifi2712a  
H2-DMa  
Cideb  
Cd93  
Icosl  
Dock4  
Pgap1  
4931406C07Rik  
Mmp2  
Mrc1  
St3gal3  
Scarf2  
Snx20

Dnajc27  
Sirpa  
Lamb1  
Btn1  
Oasl2  
Fmo5  
Col4a1  
Fscn1  
Rorc  
Bola3  
Oas1g  
Prdm1  
Selplg  
Cdkn2b  
Gm8909  
Clca1  
Csf2rb2  
Tfpi2  
A430105I19Rik  
Tbc1d1  
Ncf1  
Tmsb4x  
Ffar2  
Pcsk1  
Lrrc32  
Htra1  
Fbxw17  
Hcls1  
Tmem139  
Grina  
Prdx6b  
Tgfb1  
Saa1  
Samhd1  
Hba-a1  
Guca2a  
Fgl2  
Rfk  
Cyp3a13  
Trpv6  
Gm9833  
Map10  
B2m  
Slc12a4  
Vsir

Pglyrp1  
Fgd2  
2200002D01Rik  
Golt1a  
Cgrrf1  
Fabp5  
Syne3  
Pdgfra  
Sdcbp2  
H2-Q2  
Slc23a3  
Mmrn2  
Lpcat4  
Acyp2  
Nkx2-3  
Acot4  
Txn1  
Cdhr2  
Prdx6  
Ifit1bl2  
Rftn1  
Mettl7b  
Snrpn  
Hcn2  
Slc9a3r1  
Col15a1  
Bank1  
Gprc5b  
Rab31  
Fam105a  
P2ry4  
Ptprc  
Themis2  
Slc30a10  
Rhod  
Prickle1  
Oaf  
Nov  
Slc1a4  
Dusp5  
Atg4a  
Scin  
Pcdhgb2  
Slc46a3  
Rhobtb3

Rnf150  
Irf7  
Lyz1  
Prex2  
Ddah1  
Cd36  
Robo4  
Bmp4  
Syt15  
Ddx60  
Ceacam1  
4-Sep  
Tesk2  
Muc2  
Cyp2d22  
Col23a1  
Chmp1b  
Aldh1a1  
Fa2h  
Lrrc8c  
Pde9a  
Dnm3os  
Spata7  
H1f0  
Col5a2  
H2-Q5  
Reln  
Celf2  
Ephx2  
Anapc10  
Slc51b  
Zfp677  
Lacc1  
Cybb  
Trib2  
Oasl1  
Mmp15  
Col5a1  
Cxcl16  
Adgrl4  
Gcnt3  
Arl4a  
Sdk1  
Car13  
Adamts2

Fgfr1  
Ermp1  
Pde6d  
Syap1  
Maf  
Cd44  
Slc9a2  
Slc43a3  
Cyp2f2  
Gcc2  
B3gnt2  
Palm  
Plau  
Mblac1  
Rassf4  
Zfp759  
Mmp28  
Vcan  
Podxl  
Cd34  
Pecam1  
Sowaha  
Cyp2d12  
Crispld2  
Mpeg1  
Pim1  
Hdhd3  
Stard3nl  
Il18  
Kdr  
Fbxo25  
Ethe1  
Aqp4  
4921531C22Rik  
Sval1  
Scand1  
Slco3a1  
Rab17  
Cyp2c40  
Csf1r  
Slc25a40
